# Supplementary material for: Bioinspired Divide-and-Conquer Design Methodology for a Multifunctional Contour of a Curved Lever
Source: MDPI journal article supplement (doi:10.3390/app11136015), 2021-06-28
Supplement: s1 [file s1]

Archive with 1 entries (1 files):
- applsci-1257871-supplementary.pdf
