# Supplementary material for: Bioinspired Divide-and-Conquer Design Methodology for a Multifunctional Contour of a Curved Lever
Source: MDPI journal article supplement (doi:10.3390/app11136015), 2021-06-28
Supplement: s1 [file s1 › applsci-1257871-supplementary.pdf]

## Supplementary Materials Figure S1

| Algorithm: Pseudo code for design lever contours for CVGC case study |                                                                                                                                                                                                                                                                                                                                                                                                                                                                                                                                                                                                                                                                                                                                                                                                                                                                                                                 |
|----------------------------------------------------------------------|-----------------------------------------------------------------------------------------------------------------------------------------------------------------------------------------------------------------------------------------------------------------------------------------------------------------------------------------------------------------------------------------------------------------------------------------------------------------------------------------------------------------------------------------------------------------------------------------------------------------------------------------------------------------------------------------------------------------------------------------------------------------------------------------------------------------------------------------------------------------------------------------------------------------|
| Input:                                                               | <i>Environment variables</i><br>$x_{pivot}^{\#}$ : x coordinates for pivots, $y_{pivot}^{\#}$ : y coordinates for pivots. ( $\#$ : 1 – 9)<br>$x_{spg}$ : x coordinates for reference point of spring follower guide, $\phi_{spg}$ : angle of spring follower guide<br>Other variables including Cam profile, size of followers                                                                                                                                                                                                                                                                                                                                                                                                                                                                                                                                                                                  |
| Output:                                                              | Coefficients defining each partial contour<br>$Coeffi_{PC1}$ : Coefficients defining partial contour 1 (Hermite spline)<br>$Coeffi_{PC2}$ : Coefficients defining partial contour 2 (B spline)<br>$Coeffi_{PC3}$ : Coefficients defining partial contour 3 (Circle and straight line)<br>$Coeffi_{PC4}$ : Coefficients defining partial contour 1 (Hermite spline)                                                                                                                                                                                                                                                                                                                                                                                                                                                                                                                                              |
| Function rotationangleCal                                            | <i>(Environmental variables, cam rotation angle)</i><br>$rotationangle \leftarrow$ determined by geometric relations of pivot and lever _roation angle<br>Return lever _rotationangle                                                                                                                                                                                                                                                                                                                                                                                                                                                                                                                                                                                                                                                                                                                           |
| Function designPC1                                                   | <i>(Environmental variables, lever _rotationangle)</i><br>for i =1:9<br>Spring follower positions in lever coordinates $\leftarrow$ determined by coordinate transformation<br>end<br>Representative point of each spring follower trace $\leftarrow$ determined by common tangential line between adjacent spring follower circles<br>$Coeffi_{PC1} \leftarrow$ Coefficient of 2 <sup>nd</sup> order polynomial based Hermite spline between two representative points<br>Return $Coeffi_{PC1}$                                                                                                                                                                                                                                                                                                                                                                                                                |
| Function designPC2                                                   | <i>(Environmental variables, lever _rotationangle)</i><br>Genetic algorithm<br>Design variables: coefficients of B spline<br>Objective function: max deformation at bot pivot/max deformation at top pivot<br>(Bot pivot condition)<br>B spline generation in lever coordinates<br>Transformation B spline from lever coordinates to global coordinates<br>Calculation the intersection point between lever and guideline of spring follower<br>Determination of deformation length at bot pivot condition<br><br>(Top pivot condition)<br>B spline generation in lever coordinates<br>Transformation B spline from lever coordinates to global coordinates<br>Calculation the intersection point between lever and guideline of spring follower<br>Determination of deformation length at top pivot condition<br><br>Calculation the score<br>Return optimal coefficients of B spline<br>Return $Coeffi_{PC2}$ |
| Function designPC3                                                   | <i>(Environmental variables, lever _rotationangle)</i><br>Generation of straight line and arc which can avoid intervention between lever and the cam structure<br>Return $Coeffi_{PC3}$                                                                                                                                                                                                                                                                                                                                                                                                                                                                                                                                                                                                                                                                                                                         |
| Function designPC4                                                   | <i>(Environmental variables, lever _rotationangle)</i><br>Calculation of Hermite spline coefficients between the end point of PC1 and the start point of PC2<br>Return $Coeffi_{PC3}$                                                                                                                                                                                                                                                                                                                                                                                                                                                                                                                                                                                                                                                                                                                           |
